# Supplementary material for: Discovery of Chlorophyll d: Isolation and Characterization of a Far-Red Cyanobacterium from the Original Site of Manning and Strain (1943) at Moss Beach, California
Source: MDPI journal article supplement (doi:10.3390/microorganisms10040819), 2022-04-14
Supplement: s1 [file s1]

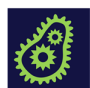

## Supplementary Materials

# Discovery of chlorophyll d: Isolation and characterization of a far-red cyanobacterium from the original site of Manning & Strain (1943) at Moss Beach, California

Nancy Y. Kiang <sup>1,2,\*</sup>, Wesley D. Swingley <sup>2,3,\*</sup>, Dikshyant Gautam <sup>3</sup>, Jared T. Broddrick <sup>4</sup>, Daniel J. Repeta <sup>5</sup>, John F. Stolz <sup>6</sup>, Robert E. Blankenship <sup>7</sup>, Benjamin M. Wolf <sup>7,†</sup>, Angela M. Detweiler <sup>4,8,‡</sup>, Kathy Ann Miller <sup>9</sup>, Jacob J. Schladweiler <sup>3</sup>, Ron Lindeman <sup>10</sup> and Mary N. Parenteau <sup>2,4,\*</sup>

**Citation:** Kiang, N.Y.; Swingley, W.D.; Gautam, D.; Broddrick, J.T.; Repeta, D.J.; Stolz, J.F.; Blankenship, R.E.; Wolf, B.M.; Detweiler, A.M.; Miller, K.A.; et al. Discovery of Chlorophyll d: Isolation and Characterization of a Far-Red Cyanobacterium from the Original Site of Manning and Strain (1943) at Moss Beach, California. *Microorganisms* **2022**, *10*, 819. <https://doi.org/10.3390/microorganisms10040819>

Academic Editor: Firstname Last-name

Received: 5 March 2022

Accepted: 11 April 2022

Published: 14 April 2022

**Publisher's Note:** MDPI stays neutral with regard to jurisdictional claims in published maps and institutional affiliations.

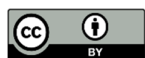

**Copyright:** © 2022 by the authors. Licensee MDPI, Basel, Switzerland. This article is an open access article distributed under the terms and conditions of the Creative Commons Attribution (CC BY) license (<https://creativecommons.org/licenses/by/4.0/>).

- <sup>1</sup> NASA Goddard Institute for Space Studies, New York, NY, 10025, USA
- <sup>2</sup> Virtual Planetary Laboratory, Nexus for Exoplanet System Science, NASA Astrobiology Program, USA
- <sup>3</sup> Department of Biological Sciences, Northern Illinois University, DeKalb, IL, 60115, USA; gautam.dikshyant@gmail.com (D.G.); jjschlad1408@gmail.com (J.J.S.)
- <sup>4</sup> NASA Ames Research Center, Moffett Field, CA, 94035, USA; jared.t.broddrick@nasa.gov (J.T.B.); angeladetweiler@gmail.com (A.M.D.)
- <sup>5</sup> Woods Hole Oceanographic Institution, Woods Hole, MA, 02543, USA; drepeta@whoi.edu (D.J.R)
- <sup>6</sup> Department of Biological Sciences; Center for Environmental Research and Education, Duquesne University, Pittsburgh, PA, 15282, USA; stolz@duq.edu
- <sup>7</sup> Departments. of Biology and Chemistry, Washington University in St. Louis, St. Louis, MO, 63130-9899, USA; reblankenship@gmail.com (R.E.B.); wolfbenjamin25@gmail.com (B.M.W.)
- <sup>8</sup> Bay Area Environmental Research Institute, Moffett Field, CA, 94035, USA
- <sup>9</sup> University Herbarium, University of California, Berkeley, CA, 94720, USA; kathyannmiller@berkeley.edu
- <sup>10</sup> Citizen Scientist, Alameda, CA, 94501, USA; ron.lindeman123@gmail.com
- \* Correspondence: nancy.y.kiang@nasa.gov (N.Y.K.); wswingley@niu.edu (W.D.S.); mary.n.parenteau@nasa.gov (M.N.P.)
- † Current address: Pluton Biosciences, Inc., 11754 Westline Industrial Dr., St. Louis, MO 63146, USA.
- ‡ Current address: Chan Zuckerberg Biohub, San Francisco, CA, USA.

## Supplementary Information

Table S1. Genbank accession numbers for strains used in this study

| GenBank Accession |                                       |                  |
|-------------------|---------------------------------------|------------------|
| number            | Strains                               | Access date      |
| GCA_000018105.1   | <i>Acaryochloris marina</i> MBIC11017 | 15 May 2020      |
| GCA_018336915.1   | <i>Acaryochloris marina</i> S15       | 10 June 2021     |
| GCA_021497025.1   | <i>Acaryochloris</i> sp. 'Moss Beach' | 18 January 2022* |
| GCA_003231495.1   | <i>Acaryochloris</i> sp. RCC1774      | 15 May 2020      |
| GCA_000238775.2   | <i>Acaryochloris</i> sp. CCMEE 5410   | 15 May 2020      |
| GCA_012032145.1   | <i>Acaryochloris</i> sp. RU_4_1       | 15 May 2020      |
| GCA_012034865.1   | <i>Acaryochloris</i> sp. CRU_2_0      | 15 May 2020      |
| GCA_012030725.1   | <i>Acaryochloris</i> sp. SU_5_25      | 15 May 2020      |

\*Submission date for *Acaryochloris* sp. 'Moss Beach'

Table S2. Guanine-cytosine (GC) percent content of strain Moss Beach compared to other *Acaryochloris* strains.

|                   | <b>Moss Beach</b> | <b>MBIC11017</b> | <b>CCMEE 5410</b> | <b>S15</b> |
|-------------------|-------------------|------------------|-------------------|------------|
| Genome size (Mbp) | 7.26              | 8.36             | 7.88              | 7.11       |
| GC content (%)    | 45                | 47               | 47                | 45         |
| ORFs              | 5843              | 8528             | 8383              | 6023       |
|                   |                   | new = 7046       | new = 6948        |            |

Table S3. Orthologous genes shared between *Acaryochloris* sp. Moss Beach against other published *Acaryochloris* strains.

| <b>Genome A</b> | <b>Genes in A</b> | <b>Genome B</b> | <b>Genes in B</b> | <b># orthologous genes</b> | <b>Orthologous fraction</b> |
|-----------------|-------------------|-----------------|-------------------|----------------------------|-----------------------------|
| Moss Beach      | 6583              | CCME 5410       | 7493              | 4214                       | 64.01%                      |
| Moss Beach      | 6583              | MBIC11017       | 7495              | 4206                       | 63.89%                      |
| Moss Beach      | 6583              | CRU_2_0         | 4206              | 2391                       | 56.85%                      |
| Moss Beach      | 6583              | RU_4_1          | 4566              | 2588                       | 56.68%                      |
| Moss Beach      | 6583              | SU_5_25         | 2261              | 1244                       | 55.02%                      |
| Moss Beach      | 6583              | RCC1774         | 5531              | 2813                       | 50.86%                      |

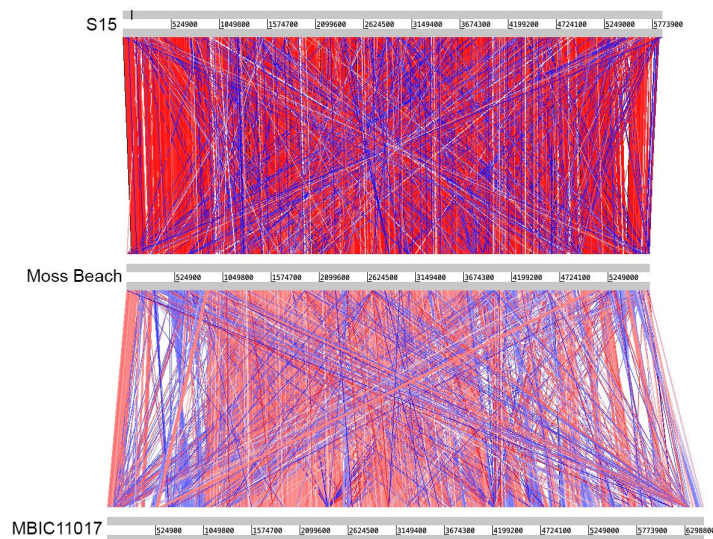

Figure S1. Artemis Comparison Tools (ACT) comparison between *Acaryochloris* sp. Moss Beach chromosome (middle) against *Acaryochloris* sp. S15 chromosome (Top) and *Acaryochloris marina* MBIC11017 chromosome (bottom) with a cut-off set to 70 percent identity. The red and blue bars show regions that are similar, with red bars indicating regions oriented in the same direction while blue bars indicating inverted orientation.

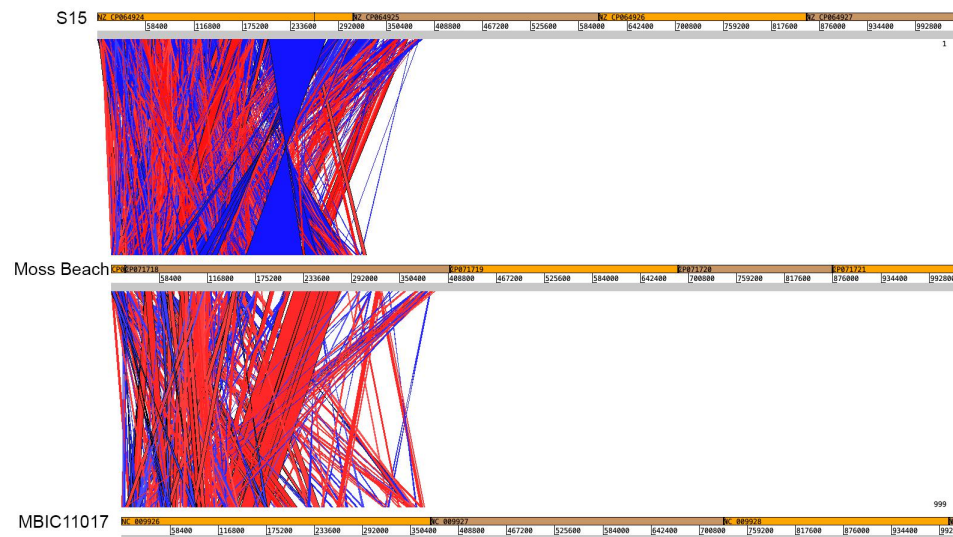

Figure S2. Artemis comparison tools (ACT) comparison between *Acaryochloris* sp. Moss Beach plasmids (middle), *Acaryochloris* sp. S15 plasmids (top), and *Acaryochloris marina* MBIC11017 plasmids (bottom) with a cut-off set to 70 percent identity. The red and blue bars show regions that are similar, with red bars indicating regions oriented in the same direction while blue bars indicating inverted orientation.
